# Supplementary material for: Intraspecific variability in the filter mesh size of suspension feeding organisms: the case of invasive Ponto-Caspian corophiids (Crustacea: Amphipoda)
Source: PeerJ journal article supplement (doi:10.7717/peerj.11245), 2021-04-19

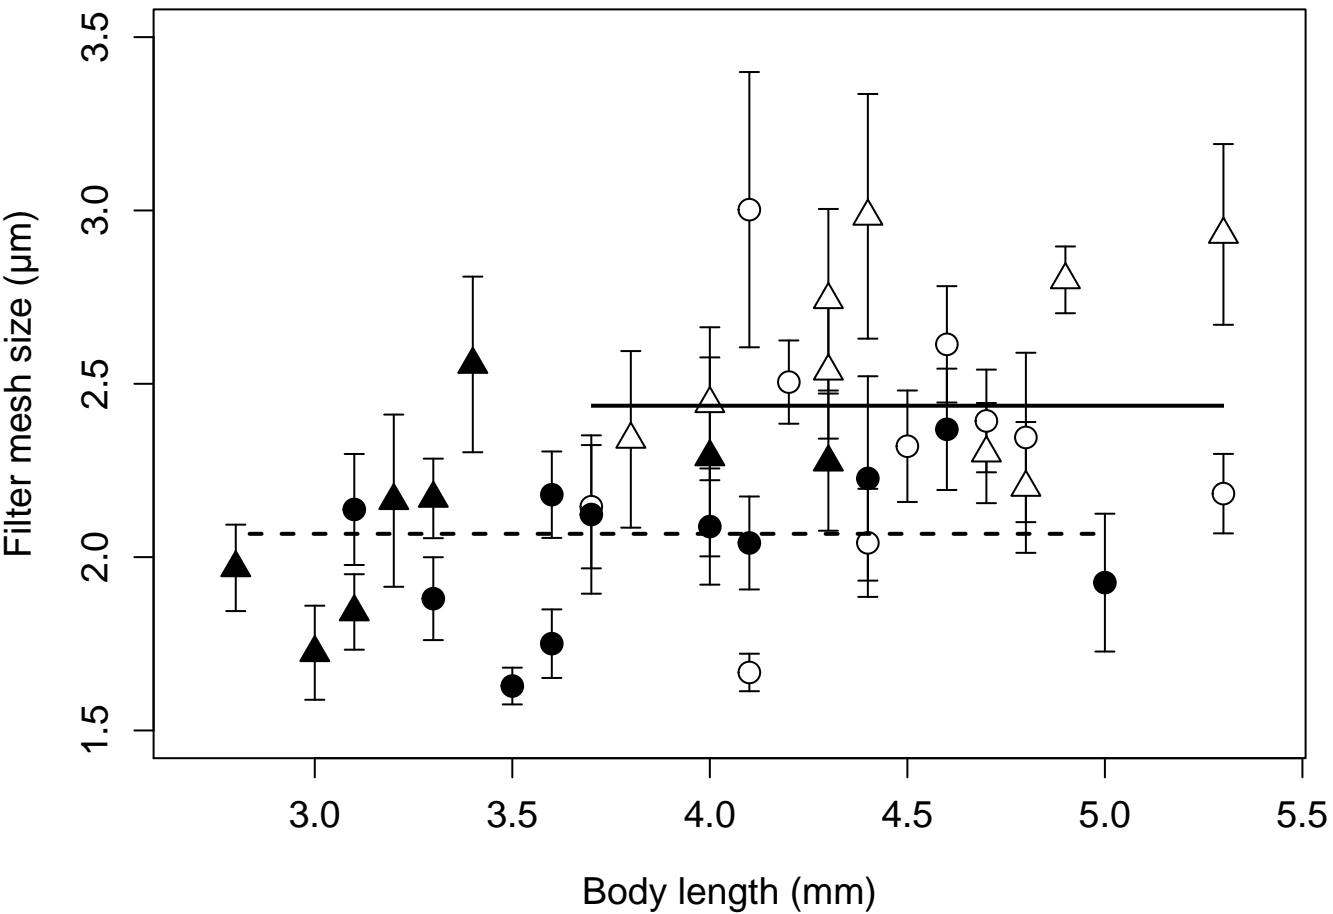

Supplement: Borza_Fig_S4.pdf [file Borza_Fig_S4.pdf]
