# Supplementary material for: Intraspecific variability in the filter mesh size of suspension feeding organisms: the case of invasive Ponto-Caspian corophiids (Crustacea: Amphipoda)
Source: PeerJ. 2021 Apr 19;9:e11245. doi: 10.7717/peerj.11245 (PMC8061577; doi:10.7717/peerj.11245)
Supplement: Supplemental Information 6 — Akaike Information Criterion (AIC) values and the p-values of likelihood-ratio tests (comparing the models with the lowest and second lowest, the second and third lowest, and the third and fourth lowest AIC) serving as the basis for the selection of optimal variance structures (weights) in the mixed-effect models per species and samples (see the text for explanation). [file peerj-09-11245-s006.xlsx]

## Sheet: CC_weights
Species	Sample no.	AIC None	AIC L	AIC M	AIC LM	p (1 vs. 2)	p (2 vs. 3)	p (3 vs. 4)	Optimal weights
C. curvispinum	1	102.614	104.074	97.4618	93.9099	0.0184611	0.00748743	0.462265	LM
	2	87.6434	89.3262	86.4376	88.2941	0.0733738	0.187371	0.0816323	None
	4	175.401	177.386	153.75	152.942	0.0937931	1.1553e-06	0.904683	M
	5	64.5946	49.9772	44.9291	46.8002	0.719575	0.0228872	4.5731e-05	M
	6	67.5677	68.8947	58.1529	53.8306	0.0119224	0.000728634	0.412025	LM
	7	-4.0808	-6.81688	-21.6777	-21.7777	0.147292	NA	0.0295362	M
	8	510.556	511.988	512.554	513.944	0.451249	NA	0.434614	None
	10	214.468	216.351	196.124	198.117	0.933753	3.80995e-05	0.732353	M
	11	525.47	526.43	517.406	518.852	0.456693	0.00494553	0.307869	M
	12	318.88	320.841	274.688	276.613	0.78459	8.98119e-11	0.843106	M
	15	329.358	327.808	297.747	296.923	0.0928934	NA	0.0595571	M
	16	311.351	311.859	287.356	288.093	0.261053	1.20499e-06	0.221994	M
	17	221.829	211.879	213.643	195.933	2.27341e-05	NA	0.00141476	LM
	19	213.964	215.386	165.375	163.931	0.0634814	1.1388e-12	0.447064	M
	21	283.206	283.706	253.885	255.444	0.506886	1.26739e-07	0.220547	M
	23	101.877	103.546	93.0234	92.5173	0.113406	0.000985801	0.564904	M
	30	14.0811	15.9197	13.2794	14.5964	0.0941662	0.175107	0.0683059	None
	31	97.4656	97.5229	74.1982	76.1753	0.87981	3.22317e-06	0.163369	M
	32	183.977	185.975	182.47	184.075	0.0611173	0.142176	0.0483054	None
	33	291.017	291.432	277.634	279.31	0.569074	0.000388397	0.2081	M
	34	247.87	240.986	249.513	242.169	0.366061	0.0078253	0.549829	L
	37	129.961	129.736	107.894	101.512	0.00378961	NA	0.135824	LM
C. robustum	15	258.605	260.334	242.702	238.537	0.0130295	2.32376e-05	0.602446	LM
	18	258.959	260.93	255.521	253.136	0.0362522	0.0197031	0.864278	LM
	19	102.483	103.076	78.7238	72.8995	0.00515483	3.86881e-07	0.235694	LM
	21	130.545	132.034	129.94	126.647	0.0214116	0.106488	0.474415	LM
	23	143.775	144.072	137.288	131.221	0.00450995	0.00357554	0.191859	LM
	29	236.66	238.436	219.134	211.599	0.00201613	9.92326e-06	0.635971	LM
C. sowinskyi	10	-186.165	-184.669	-191.258	-190.342	0.297808	0.0167644	0.477865	M
	14	-19.663	-24.885	-43.1582	-46.3788	0.0223212	NA	0.00720144	LM
	20	-233.334	-243.733	-254.823	-254.616	0.180588	0.000331625	0.000429596	M
	23	-73.495	-78.6811	-72.9748	-82.6163	0.0148414	0.00734721	0.223818	LM
	27	-266.492	-266.342	-264.517	-265.274	0.173853	0.334172	0.0968368	None
	31	-233.675	-232.081	-234.271	-232.412	0.107129	0.25443	0.126781	None
	33	17.9589	17.3079	-10.7515	-12.5582	0.0510479	NA	0.103489	M
	34	-49.0265	-53.9711	-73.3996	-73.2479	0.173977	3.97507e-06	0.0084074	M
