# Supplementary material for: Intraspecific variability in the filter mesh size of suspension feeding organisms: the case of invasive Ponto-Caspian corophiids (Crustacea: Amphipoda)
Source: PeerJ. 2021 Apr 19;9:e11245. doi: 10.7717/peerj.11245 (PMC8061577; doi:10.7717/peerj.11245)
Supplement: Supplemental Information 7 — L: body length, S: sex, 1: first power, 2: second power, +: without interaction, *: with interaction. [file peerj-09-11245-s007.xlsx]

## Sheet: CC_fixed
Species	Sample no.	p (L2*S, L1*S)	p (L2*S, L2+S)	p (L1*S, L1+S)	p (L2+S, L1+S)	p (L2+S, L2)	p (L1+S, S)	p (L1+S, L1)	p (L2, L1)	p (S, 1)	p (L1, 1)	Optimal fixed effects
C. curvispinum	1	0.650892	0.793652	0.630354	0.428023	0.167915	0.0171238	0.251439	0.8376	0.230154	0.0159511	L1
	2	0.0200092	0.00317635	0.0297929	0.307756	0.447325	0.89005	0.70979	0.438064	0.718595	0.918512	L2*S
	4	0.970312	0.0285363	0.00791365	0.995781	0.023952	0.626277	0.0190583	0.528081	0.0144438	0.394815	L1*S
	5	0.85585	0.747822	0.252663	0.308134	0.0308567	2.57658e-11	0.0103445	0.0857541	0.14963	2.57078e-10	L1+S
	6	0.0669112	0.0629685	0.286655	0.313993	0.000304102	1.285e-09	0.000490927	0.73049	0.954101	6.73527e-07	L1+S
	7	0.647019	0.00375907	0.00130213	0.835555	0.0192616	0.000151255	0.019156	0.818423	0.311488	0.0016585	L1*S
	8	0.453818	0.741159	0.538189	0.243547	0.79406	0.0899064	0.526263	0.193153	0.481263	0.0847985	1
	10	0.495613	0.396048	0.34275	0.501576	0.254552	0.998977	0.300423	0.634683	0.293435	0.859172	1
	11	0.569058	0.152165	0.0953123	0.70409	0.00674577	0.0119511	0.00708336	0.81209	0.0119305	0.0202807	L1+S
	12	0.771547	0.542123	0.386704	0.834845	0.405298	0.560952	0.420207	0.979634	0.284898	0.361724	1
	15	0.697186	0.70159	0.790461	0.773013	0.512895	0.0799854	0.517217	0.784927	0.048468	0.0105508	L1
	16	0.00361439	0.0774199	0.235234	0.00604254	0.00468146	0.0156625	0.0760245	0.101175	0.224478	0.0411949	L2+S
	17	0.0265608	0.00220721	0.0177113	0.420449	0.119574	0.0978077	0.040166	0.1185	0.067043	0.169875	L2*S
	19	0.6768	0.315947	0.0159377	0.0384245	0.347628	0.0356556	0.21769	0.0264927	0.637631	0.0775356	1
	21	0.758196	0.32678	0.177689	0.714793	0.553103	0.089675	0.595246	0.800321	0.224031	0.043488	L1
	23	0.964349	0.750642	0.347793	0.537365	0.0237706	0.0344665	0.0193608	0.39037	0.165183	0.335147	L1+S
	30	0.164162	0.34007	0.0845502	0.0352754	0.359117	0.000412903	0.897554	0.0575232	0.612034	0.00036302	L1
	31	0.585701	0.813991	0.691928	0.366563	0.618404	0.0246525	0.565398	0.343423	0.467932	0.0220157	L1
	32	0.225423	0.246327	0.965404	0.672021	0.138754	0.0949163	0.153255	0.869307	0.348898	0.202138	1
	33	0.0395139	0.0361934	0.672407	0.954543	0.00101742	0.00587477	0.000971462	0.765655	0.0205342	0.149923	L2*S
	34	0.774137	0.644496	0.544378	0.975699	0.0307768	0.105233	0.0306546	0.929813	0.125041	0.580644	1
	37	0.36373	0.0819638	0.0833508	0.893109	0.0884127	0.0552989	0.0864685	0.81635	0.363407	0.211634	1
C. robustum	15	0.0591311	0.0480291	0.00186758	0.00234286	0.0364029	0.0317526	0.0147759	0.00100177	0.0766211	0.179234	L1*S
	18	0.383444	0.260563	0.239966	0.435505	0.0915864	0.000880797	0.0259154	0.098882	0.0429459	0.00140546	S
	19	0.119716	0.307183	0.0857356	0.0278502	0.98953	0.000432476	0.258186	0.0133994	0.921081	0.000855058	L1
	21	0.408794	0.0117184	0.00397184	0.274817	0.12554	1.66415e-05	0.0296409	0.0586292	0.315496	0.000118458	L1*S
	23	0.000863891	6.30332e-05	0.00657729	0.14263	0.282011	0.0131216	0.776336	0.300338	0.867835	0.0135211	L2*S
	29	0.865229	0.860094	0.907255	0.967412	0.509	0.00286109	0.455179	0.725515	0.837922	0.00379765	L1
C. sowinskyi	10	0.613849	0.713405	0.816154	0.551491	0.150271	0.90391	0.19033	0.988206	0.190311	0.903428	1
	14	0.251004	0.0155866	0.00403606	0.0997584	0.022182	1.74607e-06	0.00739323	0.0310028	0.37363	4.93568e-05	L1*S
	20	0.766959	0.256598	0.0787112	0.342389	0.00550793	3.03294e-07	0.00274952	0.141324	0.861404	3.20458e-05	L1+S
	23	0.189164	0.0202994	0.0346071	0.984011	1.07207e-06	6.27007e-06	6.13017e-07	0.299344	0.00362383	0.0455984	L1*S
	27	0.389503	0.670075	0.131138	0.0666351	0.00116154	1.0665e-05	0.00068751	0.0373103	0.17096	0.00180278	L1+S
	31	0.340794	0.411682	0.703518	0.469658	3.04669e-05	6.00954e-09	3.45398e-05	0.593848	0.514706	3.53503e-05	L1+S
	33	0.718505	0.685685	0.593325	0.661527	0.071174	0.458146	0.0735938	0.711356	0.0705868	0.431511	1
	34	0.339498	0.584892	0.297478	0.140417	0.0441981	0.0459668	0.0938148	0.334325	0.415262	0.175088	1
