# Supplementary material for: Intraspecific variability in the filter mesh size of suspension feeding organisms: the case of invasive Ponto-Caspian corophiids (Crustacea: Amphipoda)
Source: PeerJ. 2021 Apr 19;9:e11245. doi: 10.7717/peerj.11245 (PMC8061577; doi:10.7717/peerj.11245)
Supplement: Supplemental Information 8 — L: body length, S: sex, 1: first power, 2: second power, ’:’ : interaction. [file peerj-09-11245-s008.xlsx]

## Sheet: CC_models
Species	Sample no.	Fixed variance	Random variance	Residual variance	Weight (M)	Weight (L)	Parameter	Value	SE	Df	t	p
C. curvispinum	1	0.0298	0.1059	0.0043	1.74	-0.63	(Intercept)	2.66	0.33	207	8.19	0
							L1	0.21	0.09	21	2.46	0.0227
	2	0.1244	0.212	0.0612			(Intercept)	3.5	0.14	196	24.65	0
							L1	-2.13	1.73	196	-1.23	0.2186
							L2	-2.84	1.76	196	-1.62	0.1078
							S(Male)	0.17	0.25	18	0.67	0.5102
							L1:S(Male)	10.58	3.65	18	2.9	0.0096
							L2:S(Male)	12.05	4.81	18	2.5	0.0222
	4	0.0901	0.1344	0.0005	2.01		(Intercept)	3.82	0.43	216	8.98	0
							L1	-0.1	0.12	20	-0.84	0.4107
							S(Male)	-1.9	0.9	20	-2.11	0.048
							L1:S(Male)	0.63	0.24	20	2.61	0.0166
	5	0.2173	0.0791	0.0021	1.29		(Intercept)	1.48	0.24	315	6.29	0
							L1	0.44	0.05	32	9.12	0
							S(Male)	0.3	0.12	32	2.57	0.0149
	6	0.1345	0.0531	0.0025	1.99	-0.64	(Intercept)	1.44	0.23	261	6.32	0
							L1	0.45	0.06	26	8.11	0
							S(Male)	0.37	0.1	26	3.66	0.0011
	7	0.1179	0.0634	0.0014	1.52		(Intercept)	2.06	0.34	207	6.12	0
							L1	0.24	0.09	19	2.55	0.0197
							S(Male)	-1.56	0.59	19	-2.67	0.0152
							L1:S(Male)	0.58	0.18	19	3.26	0.0041
	8	0	0.3654	0.2618			(Intercept)	5.06	0.12	261	43.57	0
	10	0	0.4562	0.0016	1.36		(Intercept)	4.45	0.14	216	31.97	0
	11	0.453	0.6637	0.0202	0.89		(Intercept)	4.42	0.71	207	6.22	0
							L1	0.4	0.16	20	2.51	0.0207
							S(Male)	-0.96	0.35	20	-2.72	0.0132
	12	0	0.6177	0.0004	1.88		(Intercept)	4.56	0.16	225	28.65	0
	15	0.2291	0.7773	0.0023	1.39		(Intercept)	2.43	0.8	216	3.04	0.0027
							L1	0.6	0.23	22	2.62	0.0155
	16	0.2904	0.386	0.0021	1.4		(Intercept)	4.14	0.18	214	22.68	0
							L1	6.06	2.05	214	2.95	0.0035
							L2	5.88	2.17	214	2.72	0.0071
							S(Male)	0.8	0.28	22	2.81	0.0102
	17	0.1537	0.1587	0.0039	1.81	-0.81	(Intercept)	4.19	0.12	214	36.1	0
							L1	0.77	1.47	214	0.52	0.6018
							L2	0.98	1.59	214	0.62	0.5368
							S(Male)	0.04	0.25	20	0.15	0.8836
							L1:S(Male)	1.99	4.18	20	0.48	0.6394
							L2:S(Male)	-12.76	5.07	20	-2.52	0.0205
	19	0	1.0354	0.0021	1.34		(Intercept)	3.9	0.21	216	18.68	0
	21	0.0989	0.5395	0.001	1.7		(Intercept)	2.91	0.65	207	4.48	0
							L1	0.36	0.18	21	2.02	0.0566
	23	0.0488	0.1758	0.0021	1.29		(Intercept)	2.17	0.67	216	3.23	0.0014
							L1	0.31	0.15	21	2.07	0.0507
							S(Male)	0.47	0.2	21	2.32	0.0307
	30	0.0392	0.0501	0.0476			(Intercept)	1.75	0.38	198	4.6	0
							L1	0.4	0.1	20	3.96	0.0008
	31	0.06	0.2594	0.0009	1.6		(Intercept)	2.65	0.44	216	5.96	0
							L1	0.32	0.14	22	2.32	0.0301
	32	0	0.2164	0.0915			(Intercept)	3.81	0.1	216	39.25	0
	33	0.5763	0.4453	0.0021	1.37		(Intercept)	4.57	0.24	169	19.18	0
							L1	5.57	3.51	169	1.59	0.114
							L2	5.23	3.52	169	1.49	0.1393
							S(Male)	1.14	0.33	15	3.41	0.0039
							L1:S(Male)	-2.46	5.01	15	-0.49	0.6311
							L2:S(Male)	-10.94	4.81	15	-2.27	0.0382
	34	0	0.3932	0.6946		-0.67	(Intercept)	4.23	0.13	225	33.29	0
	37	0	0.1787	0.0008	2.36	-0.67	(Intercept)	3.52	0.09	207	39.15	0
C. robustum	15	0.1286	0.1246	0.0027	2.13	-0.6	(Intercept)	3.37	0.46	216	7.39	0
							L1	0.05	0.09	20	0.56	0.582
							S(Male)	-2.02	0.8	20	-2.52	0.0205
							L1:S(Male)	0.56	0.18	20	3.15	0.005
	18	0.0452	0.2499	0.0138	1.38	-0.5	(Intercept)	3.86	0.14	216	28.24	0
							S(Male)	0.43	0.21	22	2.02	0.0552
	19	0.066	0.1152	0.0006	3.04	-0.97	(Intercept)	2.21	0.36	216	6.13	0
							L1	0.26	0.07	22	3.63	0.0015
	21	0.1418	0.0741	0.0187	1.15	-0.5	(Intercept)	2.59	0.25	225	10.33	0
							L1	0.18	0.05	21	4.01	0.0006
							S(Male)	-1.26	0.55	21	-2.27	0.0337
							L1:S(Male)	0.32	0.11	21	2.86	0.0093
	23	0.2038	0.116	0.0088	1.45	-0.48	(Intercept)	3.52	0.1	214	34.16	0
							L1	2.37	1.21	214	1.96	0.0516
							L2	2.34	1.39	214	1.68	0.0935
							S(Male)	1.13	0.33	20	3.45	0.0025
							L1:S(Male)	16.68	3.63	20	4.59	0.0002
							L2:S(Male)	19.84	6.69	20	2.97	0.0076
	29	0.1143	0.2585	0.0013	2.36	-0.67	(Intercept)	2.84	0.44	198	6.5	0
							L1	0.23	0.07	20	3.04	0.0064
C. sowinskyi	10	0	0.0242	0.0013	1.82		(Intercept)	2.04	0.04	189	58.06	0
	14	0.1408	0.0491	0.0067	2.16	-0.78	(Intercept)	1.1	0.27	198	4.01	0.0001
							L1	0.3	0.07	18	4.38	0.0004
							S(Male)	-1.04	0.49	18	-2.15	0.0457
							L1:S(Male)	0.38	0.13	18	2.86	0.0103
	20	0.0709	0.027	0.0025	1.39		(Intercept)	0.26	0.21	171	1.22	0.2244
							L1	0.41	0.06	16	6.9	0
							S(Male)	0.26	0.08	16	3.1	0.0068
	23	0.0734	0.0256	0.0725	0.78	-0.75	(Intercept)	1.09	0.2	216	5.48	0
							L1	0.2	0.05	20	4.09	0.0006
							S(Male)	-0.25	0.38	20	-0.66	0.5156
							L1:S(Male)	0.21	0.1	20	2.03	0.0562
	27	0.0158	0.0093	0.0122			(Intercept)	1.1	0.13	189	8.3	0
							L1	0.2	0.04	18	5.23	0.0001
							S(Male)	0.17	0.05	18	3.63	0.0019
	31	0.0517	0.0132	0.0141			(Intercept)	0.58	0.14	189	4.14	0.0001
							L1	0.3	0.04	18	8.49	0
							S(Male)	0.28	0.06	18	4.77	0.0002
	33	0	0.113	0.0007	2.29		(Intercept)	2.44	0.08	171	31.02	0
	34	0	0.0521	0.0005	2.76		(Intercept)	2.06	0.05	171	38.2	0
