# Supplementary material for: Intraspecific variability in the filter mesh size of suspension feeding organisms: the case of invasive Ponto-Caspian corophiids (Crustacea: Amphipoda)
Source: PeerJ. 2021 Apr 19;9:e11245. doi: 10.7717/peerj.11245 (PMC8061577; doi:10.7717/peerj.11245)
Supplement: Supplemental Information 9 [file peerj-09-11245-s009.xlsx]

## Sheet: tableS4
Species	Sample no.	Fixed variance	Random variance	Residual variance
C. curvispinum	1	0.0398397	0.116437	0.067433
	2	0.124381	0.211974	0.061151
	4	0.08879	0.148984	0.0906867
	5	0.223494	0.0893028	0.0526195
	6	0.146477	0.0475604	0.0576128
	7	0.122423	0.075212	0.0416175
	8	0.063707	0.370477	0.261763
	10	0.0599354	0.511553	0.0980655
	11	0.557029	0.671124	0.44864
	12	0.0627581	0.716054	0.146656
	15	0.271492	0.944417	0.161486
	16	0.354016	0.350578	0.159209
	17	0.152769	0.156477	0.11234
	19	0.380309	0.839011	0.0945863
	21	0.156274	0.601875	0.142724
	23	0.055459	0.200224	0.06361
	30	0.0521631	0.0460065	0.0475939
	31	0.0756921	0.305669	0.0602786
	32	0.0525098	0.209302	0.0915223
	33	0.580545	0.455392	0.202457
	34	0.0811933	0.394808	0.112634
	37	0.0602626	0.152947	0.075453
C. robustum	15	0.152192	0.12078	0.135289
	18	0.153999	0.1626	0.132535
	19	0.102796	0.109527	0.0669093
	21	0.149344	0.0809749	0.076071
	23	0.20603	0.117848	0.0806171
	29	0.126017	0.318744	0.125294
C. sowinskyi	10	0.00328629	0.0286123	0.017618
	14	0.147738	0.0481318	0.0399727
	20	0.0756731	0.0278131	0.0117966
	23	0.0756043	0.023601	0.0335213
	27	0.017466	0.00910821	0.0121977
	31	0.0529993	0.0142935	0.0141467
	33	0.0248703	0.123718	0.0451474
	34	0.0187318	0.0474979	0.0331368
